# Supplementary material for: From tanghulu-like to cattail-like SiC nanowire architectures: interfacial design of nanocellulose composites toward high thermal conductivity
Source: Royal Society of Chemistry journal article supplement (doi:10.1039/d0ta04674d), 2020-01-01
Supplement: d0ta04674d1.pdf [file d0ta04674d1.pdf]

# **Electronic supplementary information**

## **From Tanghulu-like to Cattail-like SiC Nanowire Architectures: Interfacial Design of Nanocellulose Composites toward Highly Thermal Conductivity**

*Bai Xue<sup>a,b\*#</sup>, Shengdu Yang<sup>a#</sup>, Xin Sun<sup>a</sup>, Lan Xie<sup>a,b\*</sup>, and Qiang Zheng<sup>c</sup>.*

a. Department of Polymer Materials and Engineering, College of Materials and Metallurgy, Guizhou University, Guiyang 550025, China.

b. National Engineering Research Center for Compounding and Modification of Polymer Materials; National and Local Joint Engineering Research Center for Functional Polymer Membrane Materials and Membrane Processes, Guiyang 550014, China.

c. College of Polymer Science and Engineering, Zhejiang University, Hangzhou 310000, China.

*\*Corresponding Author: Bai Xue, [bxue@gzu.edu.cn](mailto:bxue@gzu.edu.cn) or [xueb126@126.com](mailto:xueb126@126.com)*

*Lan Xie, [mm.lanxie@gzu.edu.cn](mailto:mm.lanxie@gzu.edu.cn) or [lancysmile@163.com](mailto:lancysmile@163.com)*

*# Shengdu Yang and Bai Xue contributed equally to this work.*

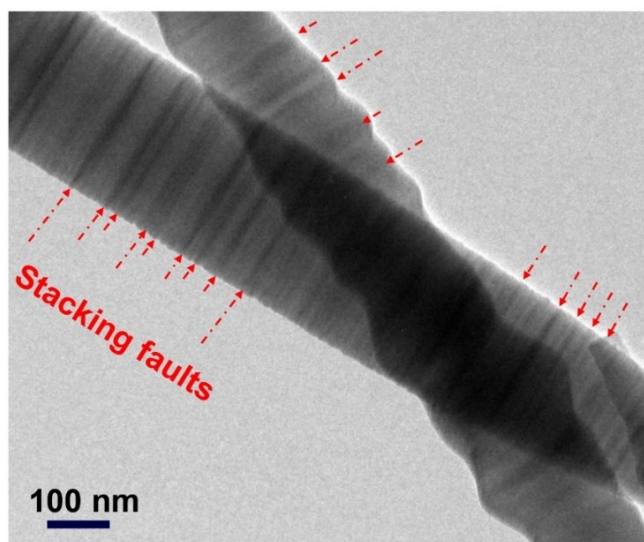

**Figure S1.** TEM image of the bare SiCNWs

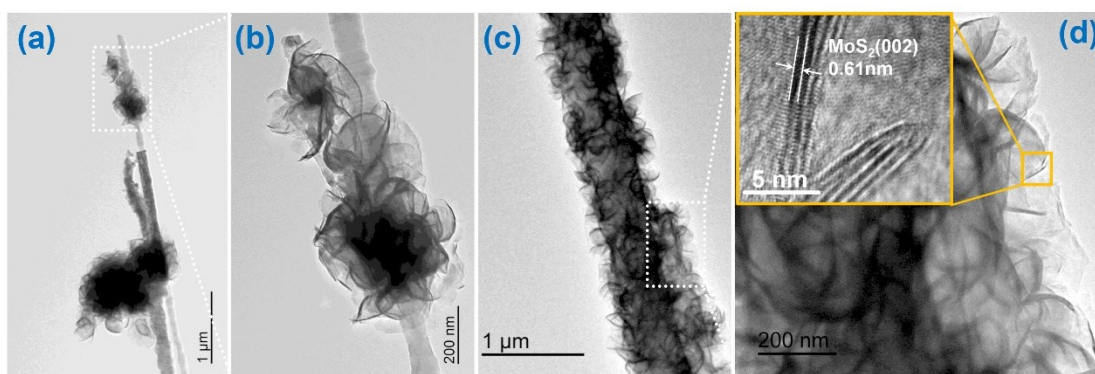

**Figure S2:** (a) and (b) TEM images of L-MoS<sub>2</sub>-SiCNWs. (c) and (d) TEM images of H-MoS<sub>2</sub>-SiCNWs.

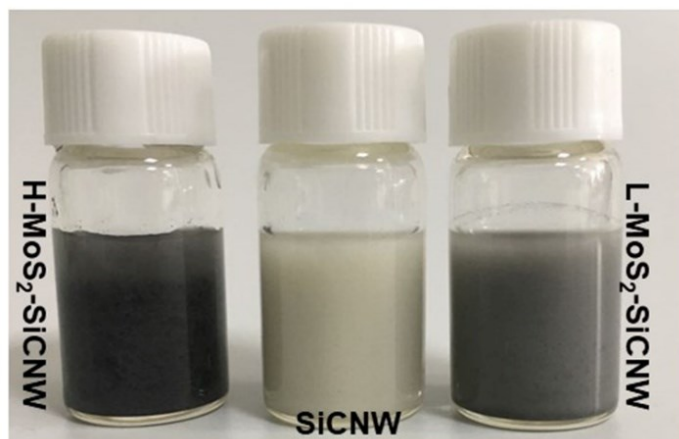

**Figure S3.** Digital photos showing the dispersion state of synthetic nanohybrids

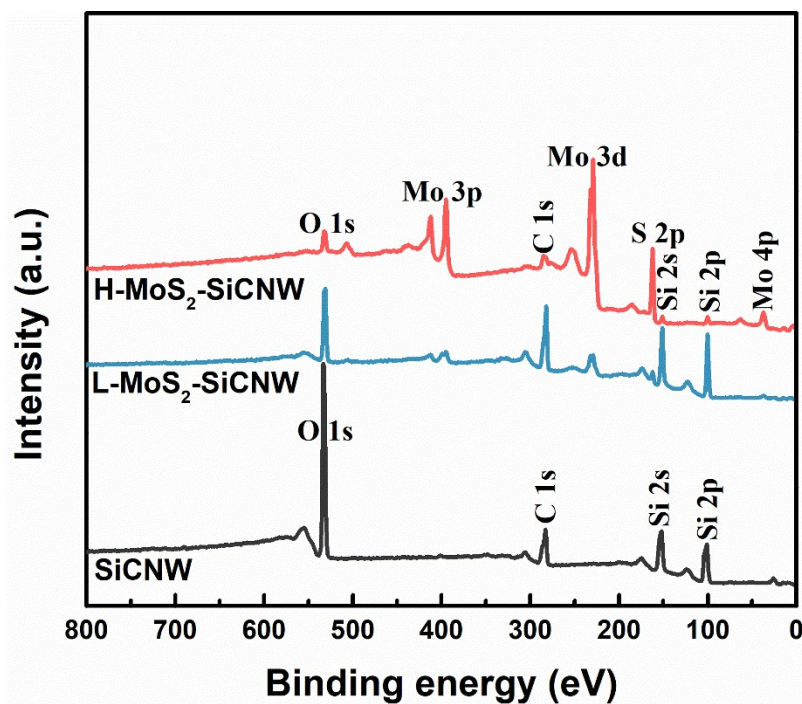

**Figure S4:** Full-range XPS spectra of bare SiCNW, L-MoS<sub>2</sub>-SiCNW, and H-MoS<sub>2</sub>-SiCNW hybrids.

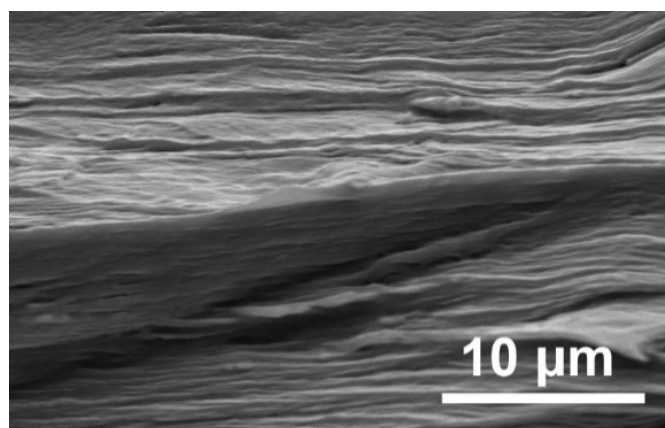

**Figure S5:** The cross-section SEM image of pure CNF film.

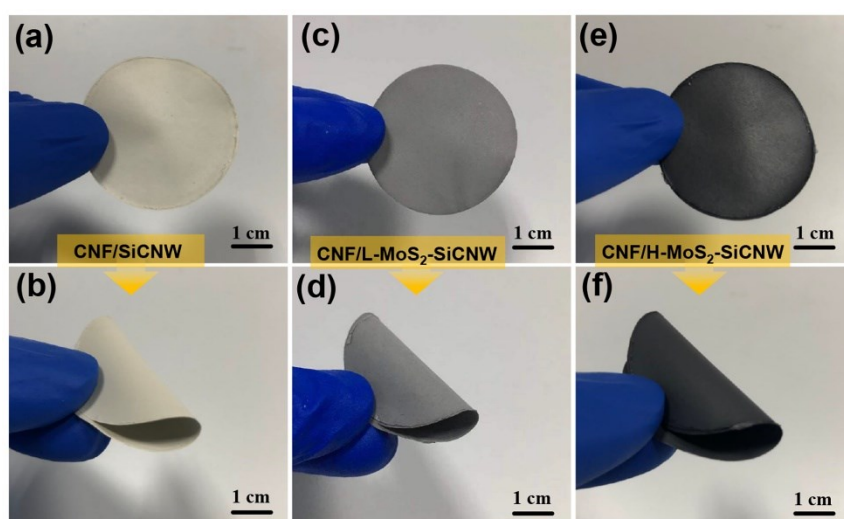

**Figure S6:** Digital photos of (a, b) CNF/SiCNW, (c, d) CNF/L-MoS<sub>2</sub>-SiCNW and (e, f) CNF/H-MoS<sub>2</sub>-SiCNW films, respectively.

**Table S1:** Comparison with TC and TCE values of previously reported composites

| Ref.      | Fillers                   | Matrix | Loading<br>(wt%)  | TC ( $W m^{-1}K^{-1}$ ) |           | TCE<br>(%) | Testing way  |
|-----------|---------------------------|--------|-------------------|-------------------------|-----------|------------|--------------|
|           |                           |        |                   | $TC_{\perp}$            | $TC_{//}$ |            |              |
| S1        | BNNS                      | Epoxy  | ~40               | ◇0.7                    | ◆6.54     | 3170       | Steady-state |
| S2        | PMMA-g-FCNT               | PMMA   | 15                | ◇~0.35                  | ◆1.16     | 510        | Laser flash  |
| S3        | ND                        | CNF    | 0.5               | ◇0.118                  | ◆9.82     | 775        | Laser flash  |
| S4        | f-BNNS                    | CNF    | 70                | ◇~0.6                   | ◆12.79    | 699        | Laser flash  |
| S5        | FCNT                      | NFC    | 35                | ◇0.83                   | ◆14.1     | 729        | Laser flash  |
| S6        | MgO@rGO                   | NFC    | 20                | ◇0.32                   | ◆6.17     | 630        | Laser flash  |
| S7        | BNNPs                     | NFC    | 40                | ◇~0.5                   | ◆20.64    | 985        | Laser flash  |
| S8        | GNP                       | PDA    | 44.4              | ◇0.69                   | ◆13.42    | -          | Laser flash  |
| S9        | rGO                       | NFC    | 30                | ◇0.07                   | ◆6.17     | 550        | Laser flash  |
| S10       | CPGO                      | CNF    | 70                | ◇~0.3                   | ◆12.75    | 165        | Laser flash  |
| S11       | BNNS@PDA                  | ANF    | 50                | ◇0.62                   | ◆3.94     | 196        | Steady-state |
| S12       | BNNS-OH                   | CNF    | 75                | ◇0.45                   | ◆15       | 235        | Laser flash  |
| This work | H-MoS <sub>2</sub> -SiCNW | CNF    | 40<br>(22.5 vol%) | ★0.68                   | ★19.76    | 1408       | Laser flash  |

According to our defined the rule of mixtures (Eq. (S1)), the thermal conductivity of L/H-MoS<sub>2</sub>-SiCNW ( $K_{p(mix)}$ ) can be calculated from,

$$K_{p(mix)} = K_{SiCNW}f + K_{MoS_2}(1-f) \quad (S1)$$

where  $K_{MoS_2}=82 \text{ Wm}^{-1}\text{K}^{-1}$ ,  $K_{SiCNW}=120 \text{ Wm}^{-1}\text{K}^{-1}$  and  $f$  is the volume fraction of SiCNW in MoS<sub>2</sub>/SiCNW hybrid.

$$\rho_{SiCNW} = 3.21\text{g/cm}^3, \rho_{MoS_2} = 4.80\text{g/cm}^3$$

The exact content of MoS<sub>2</sub> is 78.6 wt% (64.8 vol%) in L-MoS<sub>2</sub>-SiCNWs and 97.0 wt% (95.6 vol%) in H-MoS<sub>2</sub>-SiCNWs.

Thus,  $f = 35.2 \text{ vol\%}$  (L-MoS<sub>2</sub>-SiCNW),  $f = 4.4 \text{ vol\%}$  (H-MoS<sub>2</sub>-SiCNW)

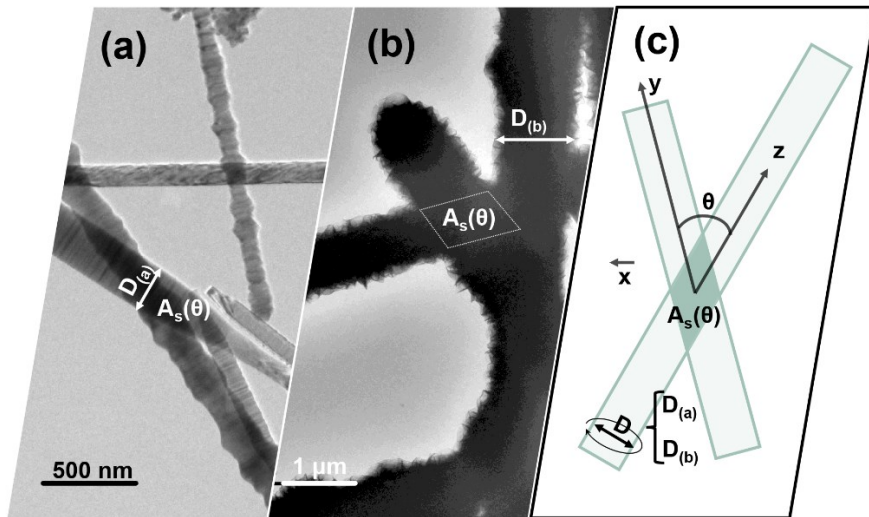

**Figure S7:** The average overlap area ( $\bar{A}_s$ ) between adjacent fillers for (a) bare SiCNWs and (b) H-MoS<sub>2</sub>-SiCNWs. (c) Schematic diagram of the average overlap area ( $\bar{A}_s$ ).

$$\bar{A}_s = \frac{2D^2}{\pi} \left[ \ln \left( \sin \frac{\theta}{2} \right) - \ln \left( \cos \frac{\theta}{2} \right) \right] \Big|_0^{\frac{\pi}{2}} \quad (S2)$$

$$A_{s,c} = \frac{D_{(a,b)}^2}{\sin(\theta_c)} \quad (S3)$$

$$\bar{A}_s = \frac{2D^2}{\pi} \delta(p) \quad (\text{S4})$$

$$\delta(p) = \ln \left[ \frac{\sqrt{1+p^{-1}} + \sqrt{1-p^{-1}}}{\sqrt{1+p^{-1}} - \sqrt{1-p^{-1}}} \right] \quad (\text{S5})$$

$\bar{A}_s = 5.46 \times 10^{-14} \text{ m}^2$  for bare SiCNWs and  $\bar{A}_s = 3.19 \times 10^{-12} \text{ m}^2$  for H-MoS<sub>2</sub>-SiCNWs.

**Table S2:** The values of  $V_c$ ,  $K_0$ , and  $t(p)$  for CNF/SiCNW and CNF/H-MoS<sub>2</sub>-SiCNW.

| Sample                        | $V_c$                | $K_0$ | $t(p)$ |
|-------------------------------|----------------------|-------|--------|
| CNF/SiCNW                     | $8.7 \times 10^{-4}$ | 5.95  | 0.23   |
| CNF/H-MoS <sub>2</sub> -SiCNW | $8.0 \times 10^{-3}$ | 6.79  | 0.50   |

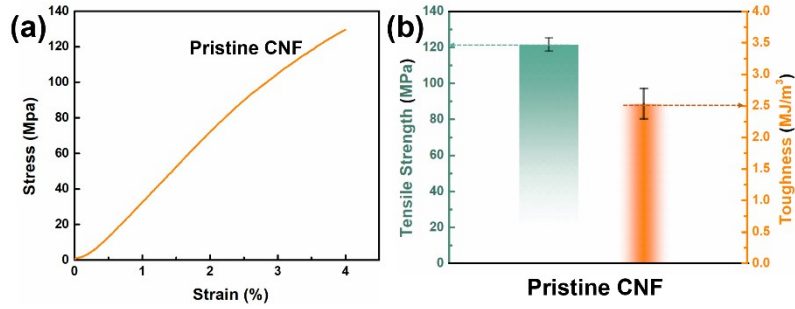

**Figure S8.** (a) Typical strain-stress curve and (b) Tensile strength and toughness of pure CNF film.

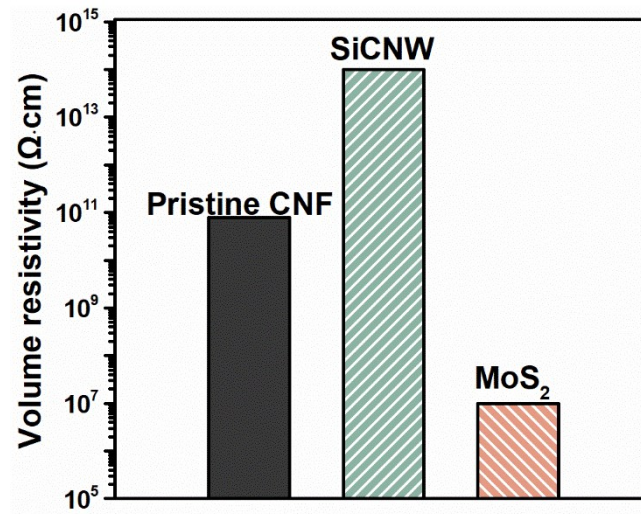

**Figure S9.** Volume resistivities of Pristine CNF, SiCNW, and MoS<sub>2</sub>

As shown in Figure S9, the volume resistance of pure SiCNWs ( $2.1 \times 10^{14} \text{ } \Omega \cdot \text{cm}$ )

is far higher than that of pure CNF film ( $7.9 \times 10^{10} \Omega \cdot \text{cm}$ ). Thus, the volume resistance of CNF/SiCNW is largely increased to  $2.4 \times 10^{13} \Omega \cdot \text{cm}$  with the introduction of 22.5 vol% SiCNWs. However, the volume resistance of MoS<sub>2</sub> is as low as  $1.3 \times 10^7 \Omega \cdot \text{cm}$ . Hence, with the introduction of SiCNW hybrids (L-MoS<sub>2</sub>-SiCNW and H-MoS<sub>2</sub>-SiCNW), the volume resistances of CNF/L-MoS<sub>2</sub>-SiCNW and CNF/H-MoS<sub>2</sub>-SiCNW are moderately reduced to  $1.7 \times 10^{13} \Omega \cdot \text{cm}$  and  $4.1 \times 10^{12} \Omega \cdot \text{cm}$ , respectively, which is still superior to that of pure CNF film.

## References

- S1. J. Han, G. Du, W. Gao and H. Bai, *Adv. Funct. Mater.*, 2019, **29**, 1904c12.
- S2. X. Wang and P. Wu, *Chem. Eng. J.*, 2019, **369**, 272-279.
- S3. N. Song, S. Cui, X. Hou, P. Ding and L. Shi, *ACS Appl. Mater. Interfaces*, 2017, **9**, 40766-40773.
- S4. K. Wu, J. Fang, J. Ma, R. Huang, S. Chai, F. Chen and Q. Fu, *ACS Appl. Mater. Interfaces*, 2017, **9**, 30035-30045.
- S5. X. Wang and P. Wu, *ACS Appl. Mater. Interfaces*, 2018, **10**, 34311-34321.
- S6. M. Ma, L. Xu, L. Qiao, S. Chen, Y. Shi, H. He and X. Wang, *Chem. Eng. J.*, 2019, **385**, 123714.
- S7. Q. Li, Z. Xue, J. Zhao, C. Ao, X. Jia, T. Xia, Q. Wang, X. Deng, W. Zhang and C. Lu, *Chem. Eng. J.*, 2020, **383**, 123101.
- S8. F. Luo, K. Wu, J. Shi, X. Du, X. Li, L. Yang and M. Lu, *J. Mater. Chem. A*, 2017, **5**, 18542-18550.
- S9. N. Song, D. Jiao, P. Ding, S. Cui, S. Tang and L. Shi, *J. Mater. Chem. C*, 2016, **4**,



305-314.

S10. Y. Liu, M. Lu, Z. Hu, L. Liang, J. Shi, X. Huang, M. Lu and K. Wu, *Chem. Eng. J.*, 2019, **383**, 122733.

S11. T. Ma, Y. Zhao, K. Ruan, X. Liu, J. Zhang, Y. Guo, X. Yang, J. Kong and J. Gu, *ACS Appl. Mater. Interfaces*, 2020, 12, 1677-1686.

S12. Z. Hu, S. Wang, G. Chen, Q. zhang, K. Wu, J. Shi, L. Liang and M. Lu, *Compos. Sci. Technol.*, 2018, **168**, 287-295.
